# Supplementary material
Source: HighWire-hosted journal article supplement (https://jnm.snmjournals.org/highwire/filestream/93868/field_highwire_adjunct_files/0/86165_Supplemental_Data.pdf)
Supplement: 86165_Supplemental_Data.pdf [file 86165_Supplemental_Data.pdf]

**Supplemental Table 1. Patient information and PET imaging results**

| Patient | Route of Administration | Site of disease                                          | Anatomical Imaging Result | FDG Imaging Result                        | huA33 Imaging Result               | Surgical Findings                                    | Lesion Size (cm)              |
|---------|-------------------------|----------------------------------------------------------|---------------------------|-------------------------------------------|------------------------------------|------------------------------------------------------|-------------------------------|
| 1       | IV                      | Cecum primary<br>8 nodes                                 | CT +<br>CT -              | +SUV 9.3<br>Neg                           | -SUV 5.0<br>Neg                    | Mod diff<br>Met adeno node                           | 5<br><1.1                     |
| 2       | IV                      | Cecum primary                                            | CT+                       | +SUV 14.9                                 | +SUV 9.7                           | Mod diff                                             | 5.5                           |
| 3       | IV                      | Cecum primary<br>2 nodes<br>Lung bilateral               | CT+<br>CT -<br>CT +       | ND                                        | + SUV8.5<br>Neg<br>+ SUV 2.5       | Mod diff<br>Met adeno node<br>No surgery             | 7<br>Na<br>2                  |
| 4       | IV                      | Cecum primary                                            | CT+                       | +SUV 11.1                                 | +SUV 1.7                           | Mod diff                                             | 3.2                           |
| 5       | IV                      | Transverse primary                                       | CT+                       | + SUV 15.1                                | +SUV 3.8                           | Mod diff                                             | 5.5                           |
| 6       | IV                      | Cecum primary                                            | CT+                       | ND                                        | +SUV na                            | Mod diff                                             | 8                             |
| 7       | IV                      | Rectal primary                                           | CT+                       | ND                                        | + SUV 9.9                          | Mod diff                                             | 3.5                           |
| 8       | IV                      | Rectosigmoid primary                                     | CT+                       | ND                                        | +SUV 11.5                          | Mod diff                                             | 3.5                           |
| 9       | IV                      | Liver<br>HCC                                             | CT+<br>CT-                | + SUV not available<br>-SUV not available | + SUV 4.7<br>Neg                   | Met adeno<br>Hepatocellular Carcinoma                | 7.8<br>1.2                    |
| 10      | IV                      | Liver<br>Left internal iliac                             | CT+<br>CT+                | +SUV 9.2<br>+SUV 14.5                     | +SUV 4.8<br>+ SUV 2.1              | Met adeno<br>Met adeno                               | 4.1<br>2                      |
| 11      | IV                      | Rectosigmoid primary                                     | CT+                       | ND                                        | + SUV 7.4                          | Mod diff                                             | 2.8                           |
| 12      | IV/IVIG                 | Aortocaval                                               | CT+                       | +SUV 5.2                                  | +SUV1.2                            | Met adeno                                            | 2                             |
| 13      | IV/IVIG                 | Left iliac node                                          | CT+                       | +SUV 5.9                                  | +SUV 3.2                           | Met adeno                                            | 4.5                           |
| 14      | IV/IVIG                 | Pre sacral                                               | CT+                       | +SUV 5.6                                  | + SUV 4.6                          | Met adeno                                            | 1.6                           |
| 15      | IV/IVIG                 | Splenic flexure primary<br>Liver<br>Cecum primary        | CT+<br>CT+<br>CT-         | +SUV 11<br>+SUV 6.7<br>+ SUV 7            | +SUV 5.2<br>+ SUV 4.7<br>-SUV 1.3  | Mod diff<br>Met adeno<br>Mod diff                    | 5.5<br>3.1<br>3.5             |
| 16      | IV/IVIG                 | Subcarinal node<br>Lung left upper<br>Lung left lower    | CT+<br>CT-<br>CT-         | +SUV 7.2<br>Neg<br>Neg                    | +SUV 1.2<br>Neg<br>Neg             | Met adeno<br>Met adeno<br>Met adeno                  | 1<br>≤ 1.5<br>≤ 1.8           |
| 17      | HAI                     | Liver>5<br>Right adrenal<br>Sternal                      | CT+<br>CT+<br>CT+         | ND                                        | + SUV 5.6<br>+ SUV 3.1<br>+ SUV1.7 | No surgery<br>No surgery<br>No surgery               | >2<br>2.9<br>2.1              |
| 18      | HAI                     | Liver>5                                                  | CT+                       | ND                                        | + SUV 9.8                          | No surgery                                           | >2                            |
| 19      | HAI                     | Liver>5<br>Supradiaphragmatic<br>Retroperitoneal<br>Lung | CT+<br>CT+<br>CT+<br>CT+  | ND                                        | + SUV 13.6<br>Neg<br>Neg<br>Neg    | No surgery<br>No surgery<br>No surgery<br>No surgery | >2 – 5.1<br>2.1<br>3.6<br>3.2 |

|    |     |                                                   |                       |                                |                            |                                                                 |                   |
|----|-----|---------------------------------------------------|-----------------------|--------------------------------|----------------------------|-----------------------------------------------------------------|-------------------|
| 20 | HAI | Liver>5                                           | CT+                   | SUV 8.9                        | + SUV 7.4                  | No surgery<br>(biopsy + on<br>follow)                           | 1.5-.4            |
| 21 | HAI | Liver<br>Right lung base<br>Presacral             | CT+/MR<br>CT+<br>CT+  | Neg<br>+SUV 2.4<br>+ SUV 13    | Neg<br>Neg<br>+SUV 4.1     | No surgery (cystic<br>benign)<br>(biopsy + on FU)<br>No surgery | 1.9<br>0.6<br>2.2 |
| 22 | IV  | Liver<br>Right lung                               | CT +<br>CT+           | +SUV 18<br>+SUV 5.4            | +SUV 14.7<br>+SUV 1.0      | No surgery<br>No surgery                                        | 1.9<br>1.3        |
| 23 | IV  | Transverse colon<br>primary<br>Liver>5<br>Rt apex | CT-<br><br>CT+<br>CT+ | Neg<br><br>+SUV9.8<br>+SUV 1.2 | Neg<br><br>+SUV 9.9<br>Neg | Mod diff<br><br>Met adeno<br>No surgery                         | 2.5<br>1<br>0.8   |
| 24 | HAI | Liver>5                                           | CT+                   | ND                             | +SUV 5.2                   | Met adeno                                                       | 1.5               |
| 25 | IV  | Liver                                             | CT+/MR+               | ND                             | Neg                        | Inflammation                                                    | Neg               |

\*The SUV values specified represent the SUVmax. In cases where multiple lesions were visualized, the SUV value presented is the highest SUVmax value among the lesions.

Mod diff = moderately differentiated adenocarcinoma

Met adeno = metastatic adenocarcinoma

ND = not detected
